# Supplementary material for: B cells reappear less mature and more activated after their anti-CD20–mediated depletion in multiple sclerosis
Source: PubMed Central journal article supplement (PMC7568262; doi:10.1073/pnas.2012249117), 2020-09-30
Supplement: pnas.2012249117.sapp.pdf [file pnas.2012249117.sapp.pdf]

Supplementary Information for

**B cells reappear less mature and more activated after their anti-CD20 mediated depletion in multiple sclerosis**

Nitzan Nissimov<sup>1</sup>, Zivar Hajiyeva MD<sup>2</sup>, Sebastian Torke PhD<sup>1</sup>, Katja Grondey<sup>1</sup>, Wolfgang Brück MD<sup>1</sup>, Silke Häusser-Kinzel PhD<sup>1</sup>, Martin S. Weber MD<sup>1,2</sup>

<sup>1</sup>Institute of Neuropathology, University Medical Center, Göttingen, Germany

<sup>2</sup>Department of Neurology, University Medical Center, Göttingen, Germany

Corresponding author: Martin S. Weber, MD

Corresponding author's address: Department of Neuropathology

Department of Neurology

University Medical Center, Georg August University

Robert-Koch-Str. 40, 37099 Göttingen, Germany

Corresponding author's phone and fax: Phone +49-551 39-7706, Fax +49-551-39-10800

Corresponding author's e-mail address: [martin.weber@med.uni-goettingen.de](mailto:martin.weber@med.uni-goettingen.de)

**This PDF file includes:**

Supplementary text

Figures S1

Tables S1 to S2

## Supplementary Information Text

### SI Materials and Methods

#### PBMCs preparation and stimulation

PBMCs were isolated by Ficoll density gradient (for detailed list of manufacturers see **Table S1**) and cryopreserved at -80°C. For analysis, cells were thawed and plated. For the analysis of activation marker and co-stimulatory molecules, PBMCs were stimulated with 2µg/ml CpG for 22 hours at 37°C and 5% CO<sub>2</sub>. For cytokine assessment, PBMC were cultured unstimulated for 22 hours, in the presence of 1µg/ml CpG for 22 hours or 20 hours unstimulated followed by 2 hours with 500pg/ml LPS. All pre-stimulation regimes were then incubated with 500ng/ml ionomycin, 20ng/ml phorbol 12-myristate 13-acetate and Golgi Plug for 4 hours.

#### Flow cytometry

Cells were pre-incubated with Fc receptor blocking solution and stained with viability dye (Zombie Dye, 1:500) for live/dead cell discrimination. For analysis of intracellular cytokines, cells were permeabilized by adding fixation/permeabilization solution. All panels and FACS antibodies used are listed in **Table S2**. Samples were analyzed on a LSRII Fortessa. All samples of the same patient were stained and analyzed in batch in order to limit the inter-assay variability. To ensure cell viability the live/dead cell discrimination was tested per panel: Panel 1 (95.88%± 1.64%; mean ± SD), Panel 2 (93.27% ± 3.58%), Panel 3 (92.65% ± 3.53%), Panel 4 (55.76% ± 14.05%), Panel 5 unstimulated (56.13% ± 15.17%), with CpG stimulated (63.94% ± 17.32%), with LPS stimulated (60.34% ± 13.60%).

#### Statistical analysis

Patients' data were tested for Gauss distribution with the Shapiro-Wilk normality test and the Kolmogorov-Smirnov normality test. For two longitudinal parametric samples paired t-test was used, for non-parametric Wilcoxon matched-pairs signed rank test.  $\alpha$ -value was corrected with the Bonferroni-Holm method. For possible correlations linear regression was used, for interval scale Spearman  $r$ , for rational scale Pearson  $r$ . A p-value < 0.05 was considered statistically significant. Patients' data were classified into 4 time points: (1) before treatment initiation (= before depletion) (2) after one to five months (= early depletion), (3) after six to eight months (= late depletion; both early and late depletion time points are at B cell absence and only differ through time) and (4) after eight to 24 months (= at reappearance; = at B cell reappearance). All sample timings are from baseline; i.e. from the first treatment administration. Since patient sampling occurred individually in the clinical routine, not all samples from each patient were obtained at each time point, and therefore sample counts change between the different sampling time points, and a multi-comparison test could not be performed.

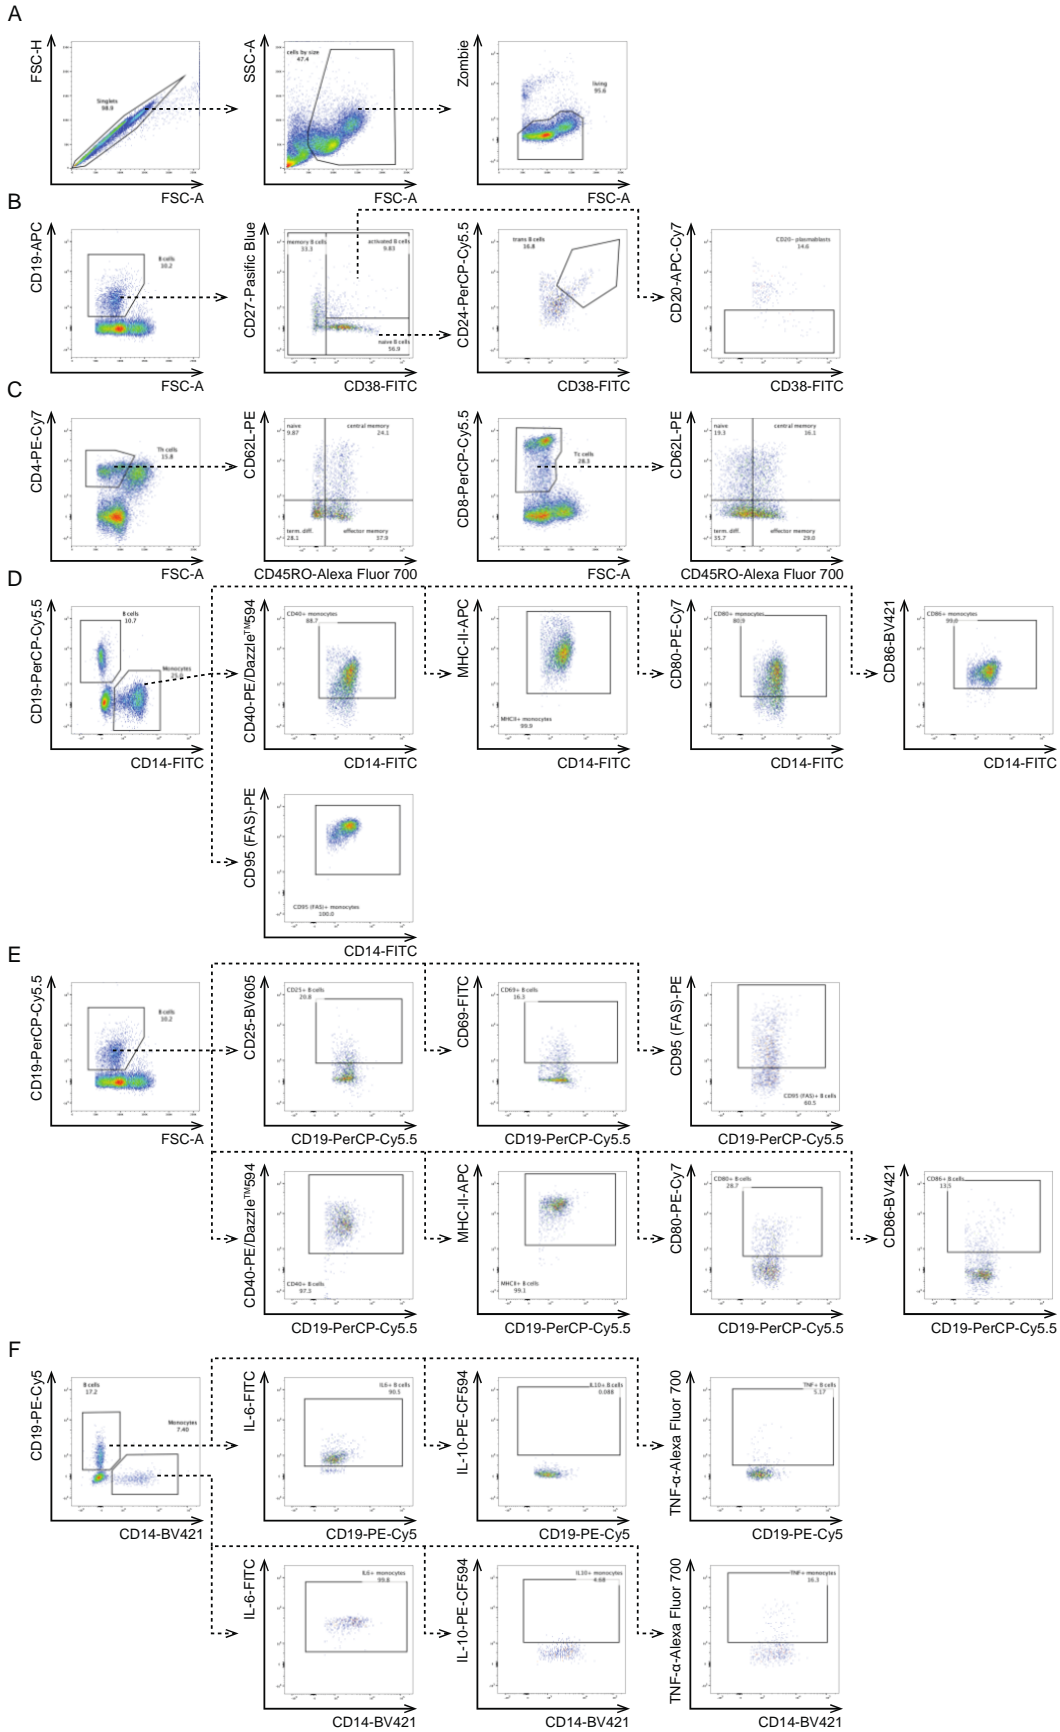

**Fig. S1. Gating strategies for flow cytometry analysis.** Peripheral blood mononuclear cells were isolated from 15 multiple sclerosis patients before anti-CD20 antibody treatment was initiated and at intervals thereafter. All gates were set based on the unstained sample (A) Pre-gating strategy. (B) Gating strategy for panel #1. (C) Gating strategy for panel #2. (D) Gating strategy for panel #3. (E) Gating strategy for panel #4. (F) Gating strategy for panel #5.

**Table S1. List of materials**

| <b>Product</b>                                                   | <b>Manufacturer</b> |
|------------------------------------------------------------------|---------------------|
| 96 well plates, round bottom (U-well)                            | Sarstedt            |
| BioColl separation solution                                      | Biochrom            |
| CpG oligodeoxynucleotides                                        | Sigma Aldrich       |
| Cytofix/Cytoperm <sup>TM</sup>                                   | BD Biosciences      |
| DMEM (Dulbecco's Modified Eagle's medium)                        | Sigma Aldrich       |
| DMSO (dimethyl-sulfoxide)                                        | Sigma Aldrich       |
| EDTA (ethylene diamine tetraacetic acid disodium salt dihydrate) | Carl Roth           |
| Ethanol 100%                                                     | Merck Millipore     |
| Fc-Block <sup>TM</sup>                                           | BioLegend           |
| FCS (fetal calf serum)                                           | Sigma Aldrich       |
| GolgiPlug <sup>TM</sup>                                          | BD Biosciences      |
| Ionomycin                                                        | Sigma Aldrich       |
| L-glutamine                                                      | Sigma Aldrich       |
| LPS (lipopolysaccharide)                                         | Sigma Aldrich       |
| PBS (phosphate buffered salt solution)                           | Sigma Aldrich       |
| Perm/Wash <sup>TM</sup> buffer, 10x                              | BD Biosciences      |
| PMA (phorbol 12-myristate 13 acetate)                            | Sigma Aldrich       |
| RPMI-1640 (Roswell park memorial institute-1640)                 | Sigma Aldrich       |
| Sodium pyruvate 100mM                                            | Sigma Aldrich       |
| TrypanBlue                                                       | Sigma Aldrich       |
| $\beta$ -mercaptoethanol                                         | Sigma Aldrich       |

**Table S2. List of flow cytometry panels and antibodies.**

| <b>Panel</b>                 | <b>Antigen</b> | <b>Fluorochrome</b> | <b>Clone</b> | <b>Manufacturer</b> |
|------------------------------|----------------|---------------------|--------------|---------------------|
| <b>#1 B cell subset</b>      | CD19           | APC                 | HIB19        | BD Bioscience, NJ   |
|                              | CD20           | APC-Cy7             | L27          | BD Bioscience, NJ   |
|                              | CD24           | PerCp-Cy5.5         | ML5          | BioLegend, CA       |
|                              | CD27           | PacificBlue         | O323         | BioLegend, CA       |
|                              | CD38           | FITC                | HIT2         | BioLegend, CA       |
|                              | Dead/Live      | ZombieAqua™         |              | BioLegend, CA       |
| <b>#2 T cell subset</b>      | CD4            | PE-Cy7              | RPA-T4       | BD Bioscience, NJ   |
|                              | CD8            | PerCP-Cy5.5         | RPA-T8       | BD Bioscience, NJ   |
|                              | CD20           | APC-Cy7             | L27          | BD Bioscience, NJ   |
|                              | CD45RO         | A700                | UCHL1        | BD Bioscience, NJ   |
|                              | CD62L          | PE                  | DREG-56      | BD Bioscience, NJ   |
|                              | Dead/Live      | ZombieAqua™         |              | BioLegend, CA       |
| <b>#3 APC activation</b>     | CD14           | FITC                | M5E2         | BD Bioscience, NJ   |
|                              | CD19           | PerCP-Cy5.5         | HIB19        | BioLegend, CA       |
|                              | CD40           | PE/Dazzle™594       | 5C3          | BioLegend, CA       |
|                              | CD80           | PE-Cy7              | L307.4       | BD Bioscience, NJ   |
|                              | CD86           | BV421               | 2331 (FUN-1) | BD Bioscience, NJ   |
|                              | CD95 (FAS)     | PE                  | DX2          | BioLegend, CA       |
|                              | MHCII          | APC                 | Tü36         | BioLegend, CA       |
|                              | Dead/Live      | ZombieNIR™          |              | BioLegend, CA       |
| <b>#4 B cell activation</b>  | CD19           | PerCP-Cy5.5         | HIB19        | BioLegend, CA       |
|                              | CD25           | BV605               | BC96         | BioLegend, CA       |
|                              | CD40           | PE/Dazzle™594       | 5C3          | BioLegend, CA       |
|                              | CD69           | FITC                | FN50         | BioLegend, CA       |
|                              | CD80           | PE-Cy7              | L307.4       | BD Bioscience, NJ   |
|                              | CD86           | BV421               | 2331 (FUN-1) | BD Bioscience, NJ   |
|                              | CD95 (FAS)     | PE                  | DX2          | BioLegend, CA       |
|                              | MHCII          | APC                 | Tü36         | BioLegend, CA       |
|                              | Dead/Live      | ZombieNIR™          |              | BioLegend, CA       |
| <b>#5 Cytokine secretion</b> | CD14           | BV421               | MφP9         | BD Bioscience, NJ   |
|                              | CD19           | PE-Cy5              | HIB19        | BD Bioscience, NJ   |
|                              | IL-6           | FITC                | MQ2-13A5     | BD Bioscience, NJ   |
|                              | IL-10          | PE-CF594            | JES3-19F1    | BD Bioscience, NJ   |
|                              | TNF-α          | A700                | MAb11        | BD Bioscience, NJ   |
|                              | Dead/Live      | ZombieNIR™          |              | BioLegend, CA       |
